# Supplementary material for: Au Nanoparticles (NPs) Decorated Co Doped ZnO Semiconductor (Co400-ZnO/Au) Nanocomposites for Novel SERS Substrates
Source: MDPI journal article supplement (doi:10.3390/bios12121148), 2022-12-08
Supplement: s1 [file s1]

## Au nanoparticles (NPs) decorated Co-doped ZnO semiconductor (Co<sub>400</sub>-ZnO/Au) nanocomposites for novel SERS substrates

Yan Zhai<sup>#</sup>, Xiaoyu Zhao<sup>#</sup>, Zhiyuan Ma, Xiaoyu Guo, \* Ying Wen and Haifeng Yang\*

The Education Ministry Key Lab of Resource Chemistry and Shanghai Frontiers Science Center of Biomimetic Catalysis, Shanghai Normal University, Shanghai 200234, P. R. China.

\*Correspondence authors: E-mail: hfyang@shnu.edu.cn (Haifeng Yang); gxy2012@shnu.edu.cn (Xiaoyu Guo).

<sup>#</sup>Equal contribution in this research

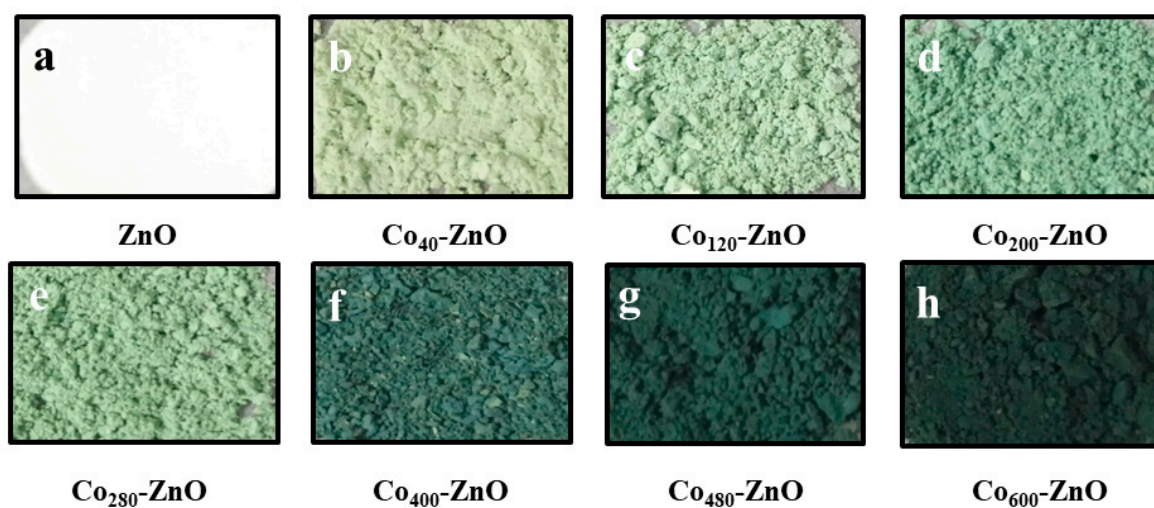

**Figure S1.** The digital pictures of the as-prepared different percent of Co-doped ZnO samples.

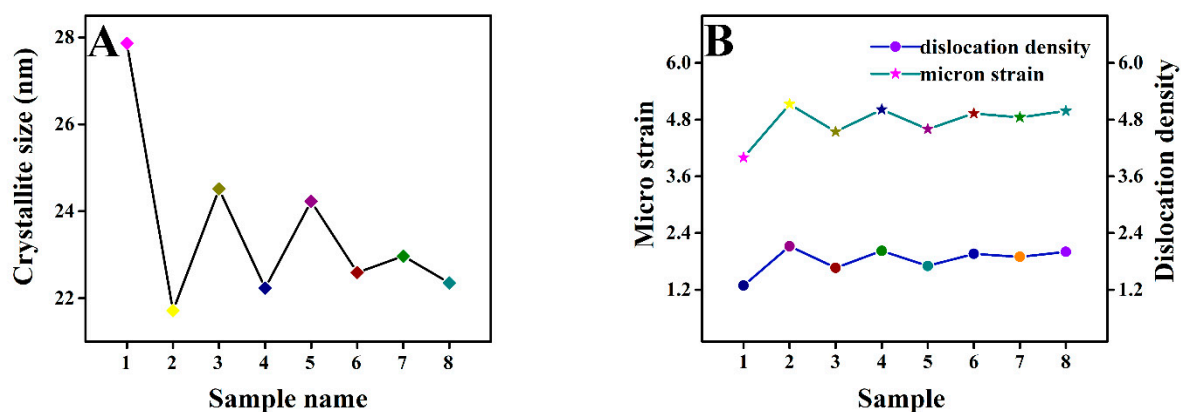

**Figure S2.** (a) Crystallite size and (b) micro strain and dislocation density for all the samples investigated in this study (from 1 to 8 : ZnO, Co<sub>40</sub>-ZnO, Co<sub>120</sub>-ZnO, Co<sub>200</sub>-ZnO, Co<sub>280</sub>-ZnO, Co<sub>400</sub>-ZnO, Co<sub>480</sub>-ZnO, Co<sub>600</sub>-ZnO, respectively).

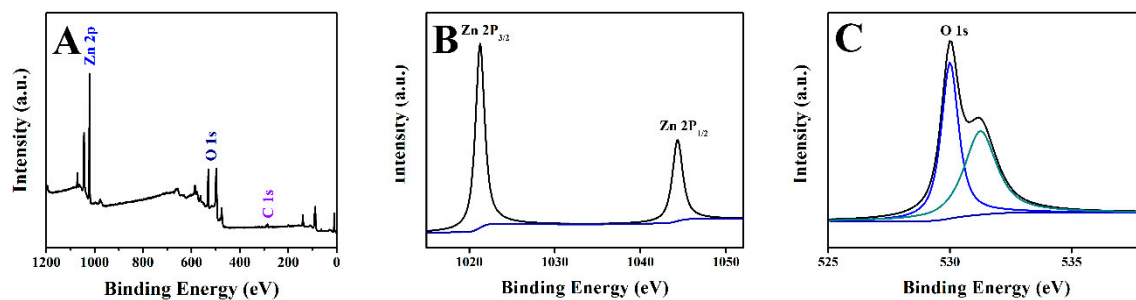

**Figure S3.** (A) XPS survey spectrum of ZnO, (B) and (C) XPS spectra of Zn 2p and O for ZnO.

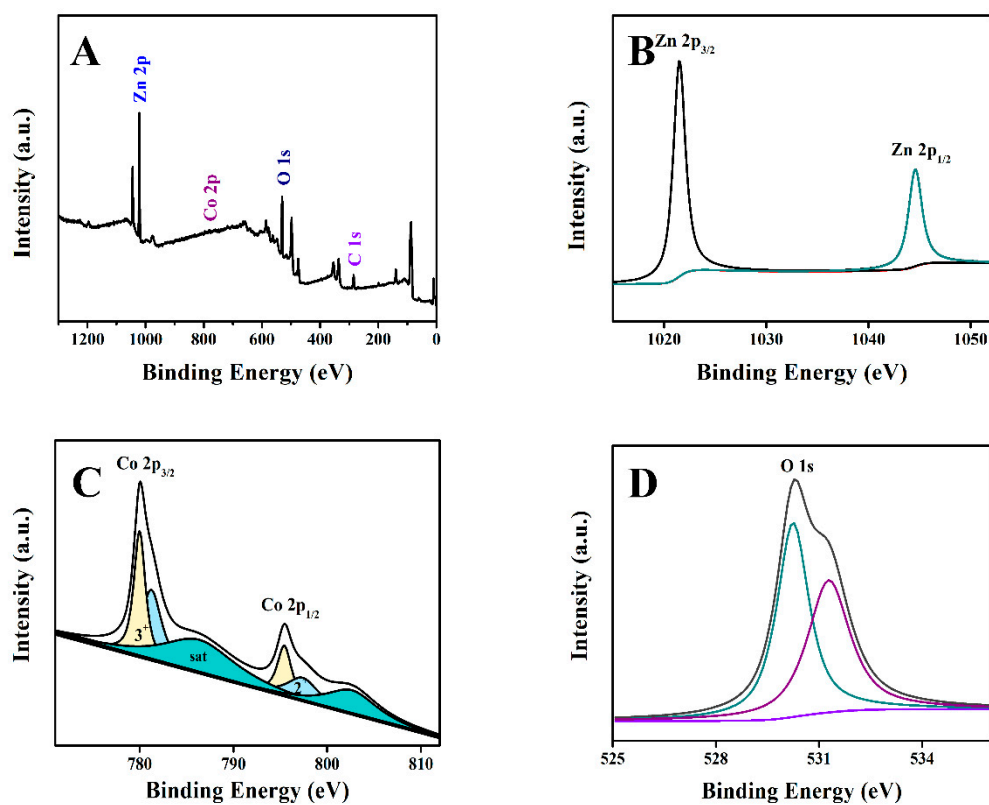

**Figure S4.** XPS spectra of (A) XPS survey spectrum of Co<sub>400</sub>-ZnO, (B) Zn 2p (C) Co 2p, and (D) O 1s for Co<sub>400</sub>-ZnO.

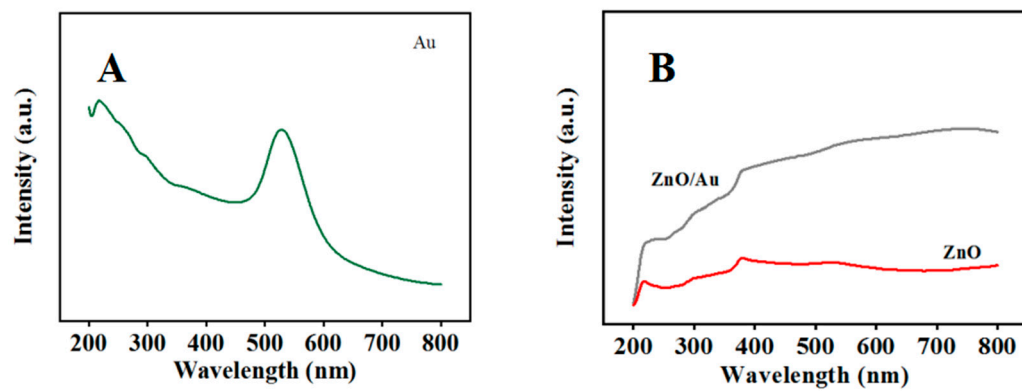

**Figure S5.** UV-vis diffusion reflectance spectra of Au(A) and ZnO/Au(B) samples.

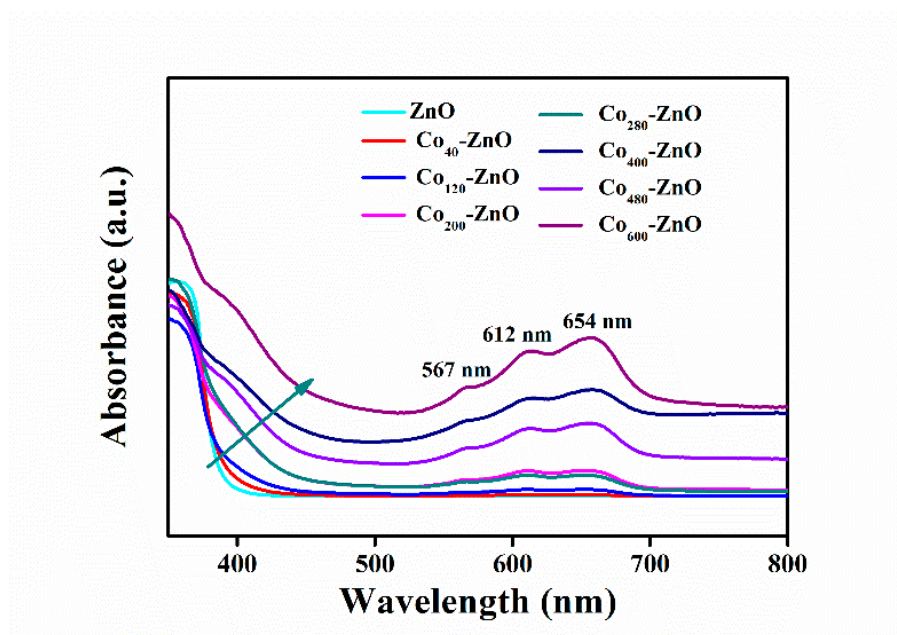

**Figure S6.** UV-vis diffusion reflectance spectra of ZnO and Co-ZnO samples.

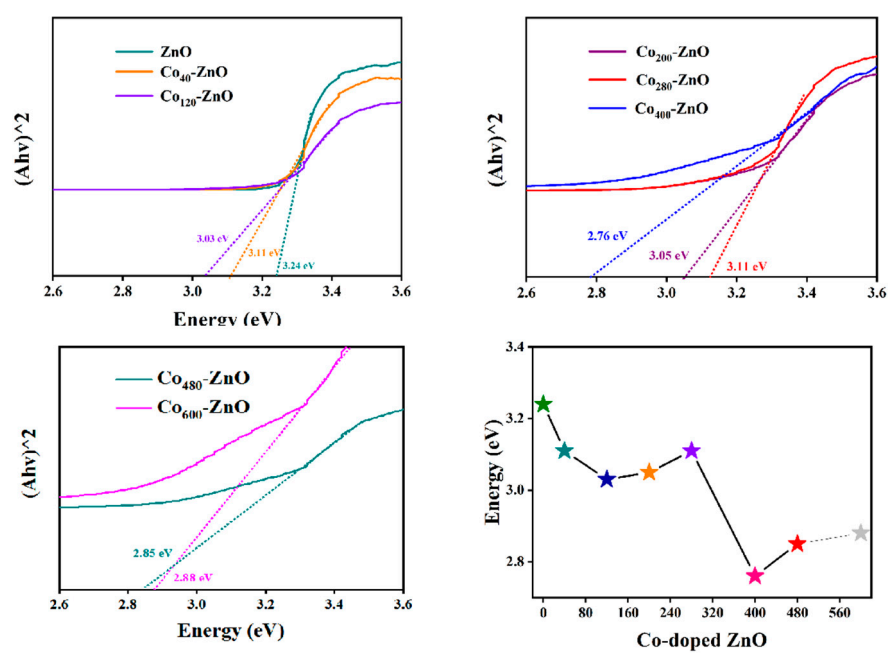

**Figure S7.** Band gaps for the as-prepared different percent of Co-doped ZnO samples.

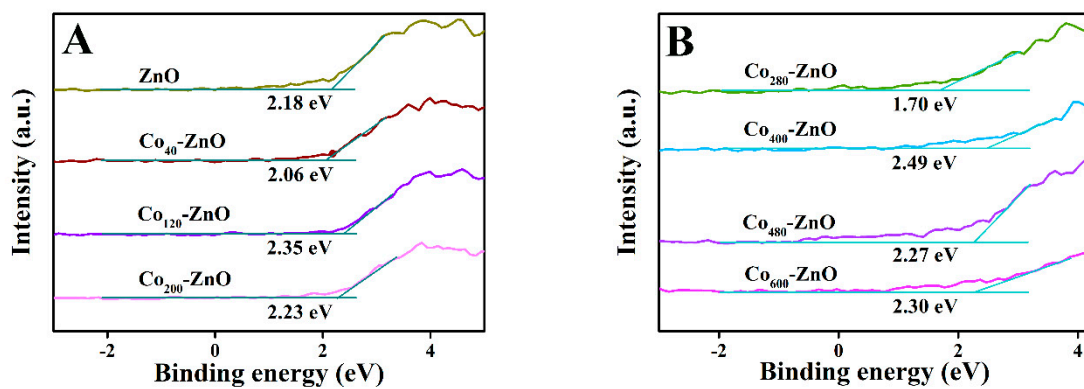

**Figure S8.** VB-XPS spectra of Co-doped ZnO samples.

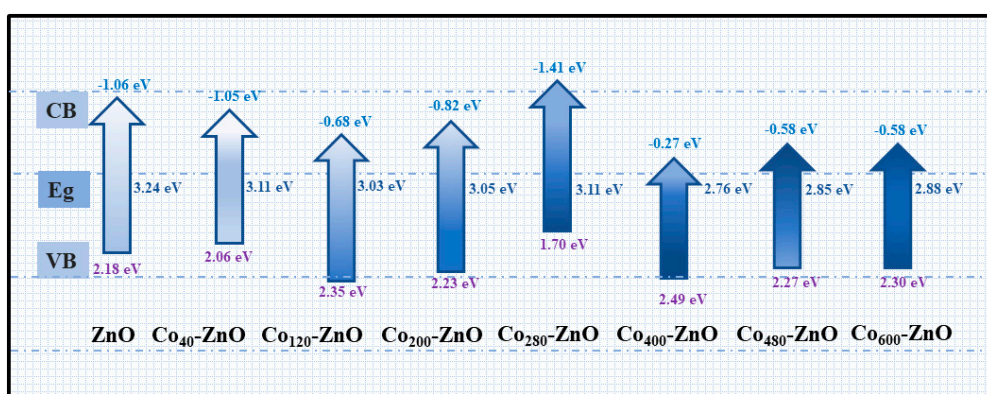

**Figure S9.** Schematic band structure evolution of Co-doped ZnO samples.



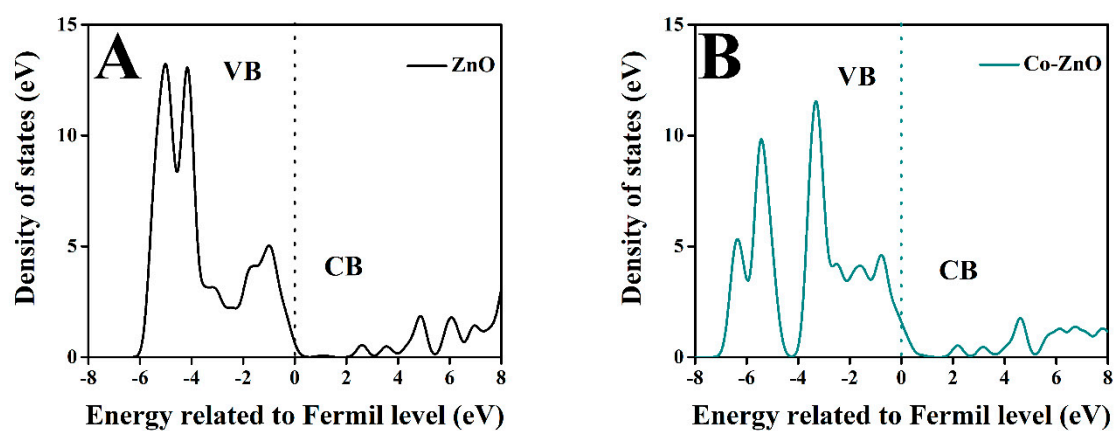

**Figure S10.** The density state of (A) pristine ZnO and (B) Co substitution in ZnO lattice. The dotted lines at energy zero represent the Fermi level.

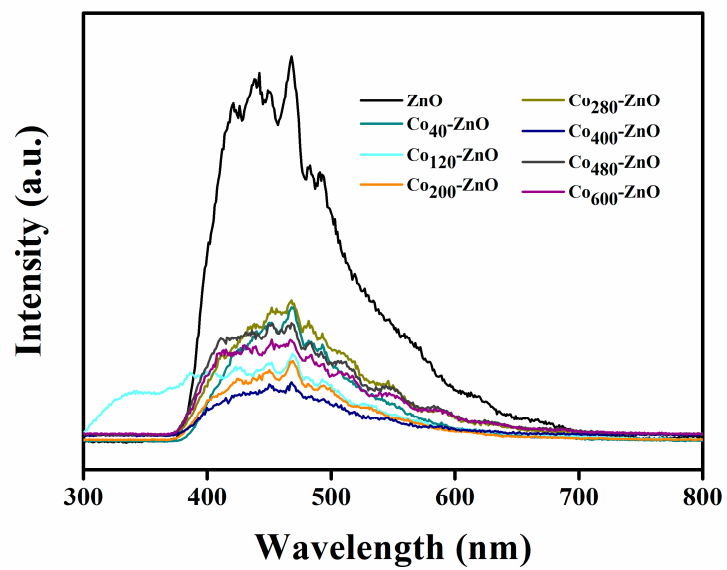

**Figure S11.** PL spectra at the excitation wavelength of 233 nm of ZnO and Co-doped ZnO samples.

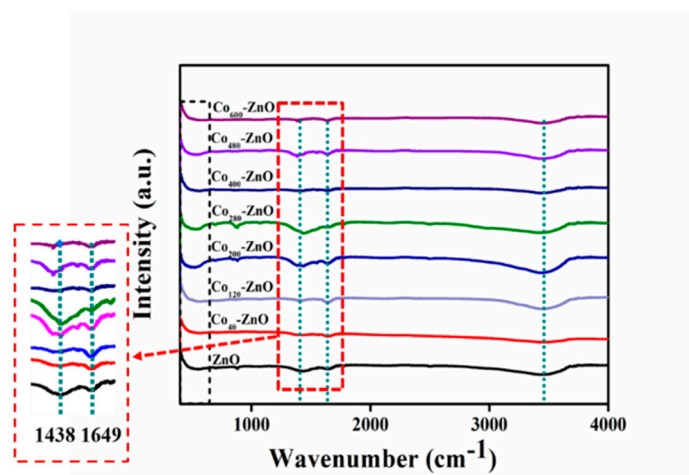

**Figure S12.** FTIR spectra of ZnO and Co-doped ZnO samples.

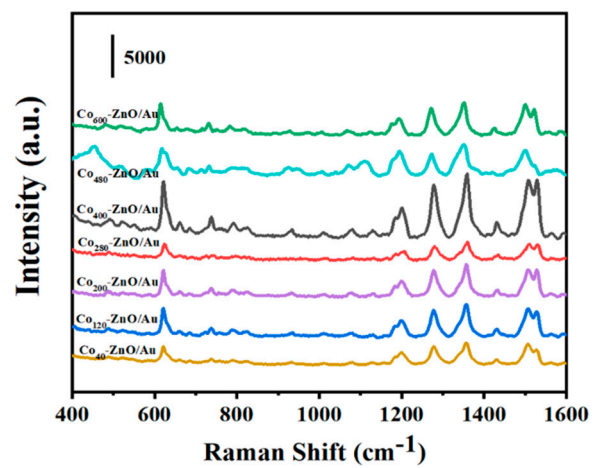

**Figure S13.** The Raman spectra of R6G( $10^{-6}$  M) on Co-ZnO/Au substrates.

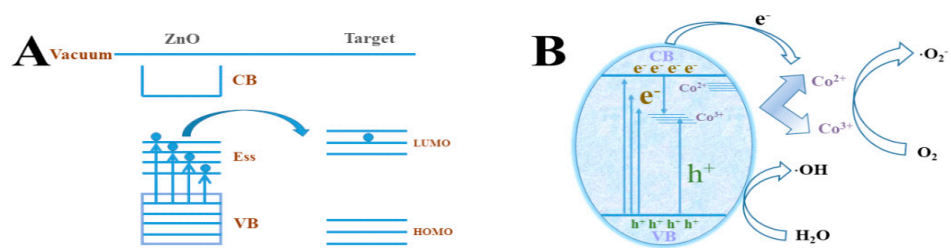

**Figure S14.** Band structure of the ZnO (A) and change in the band structure of ZnO by Co dopant.

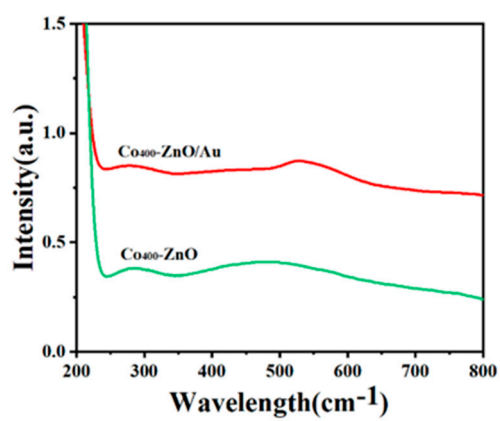

**Figure S15.** UV-vis diffusion reflectance spectra of Co<sub>400</sub>-ZnO and Co<sub>400</sub>-ZnO/Au samples.

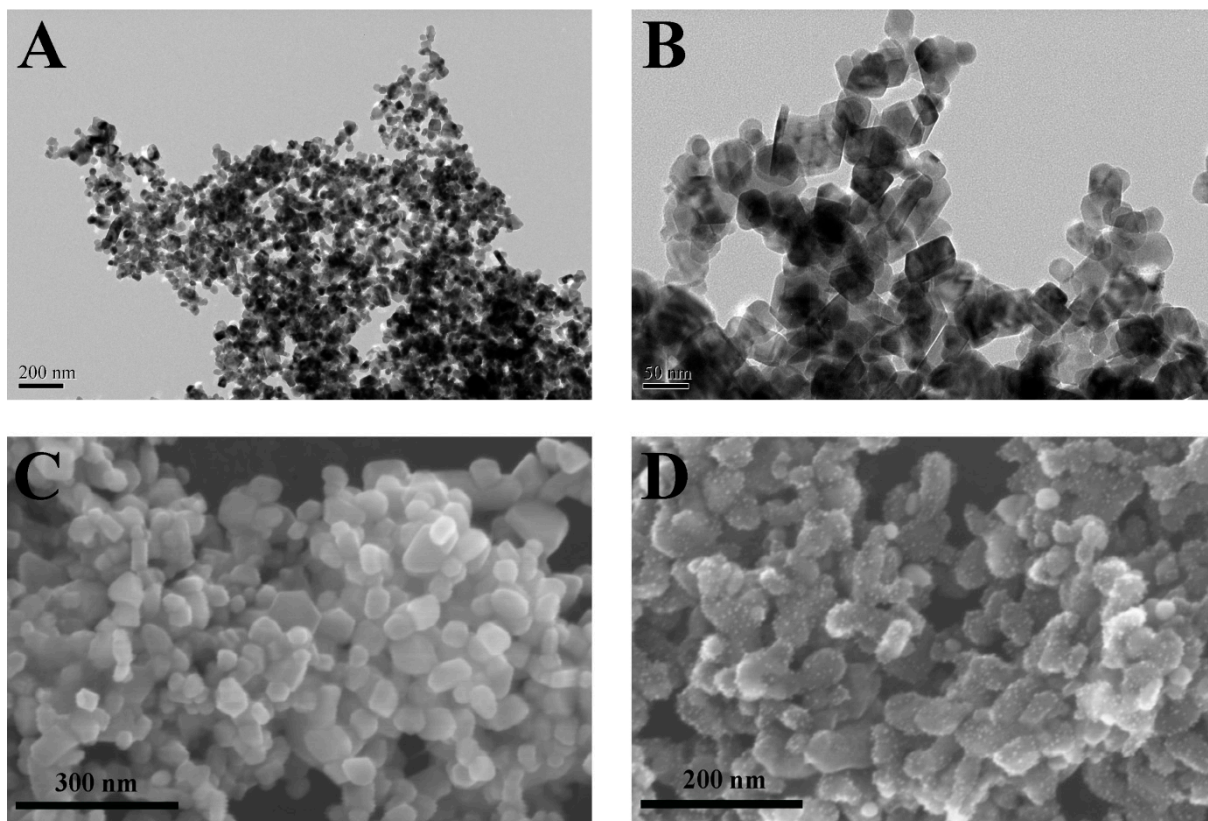

**Figure S16.** (A)(B) TEM images of Co<sub>400</sub>-ZnO. (C) SEM image of Co<sub>400</sub>-ZnO. (D) SEM image of Co-ZnO/Au.

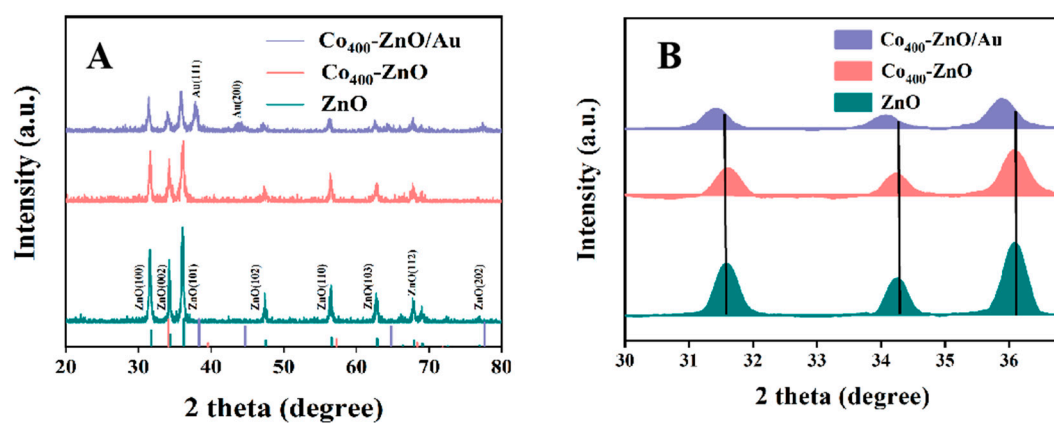

**Figure S17.** XRD patterns of  $\text{ZnO}$ ,  $\text{Co}_{400}\text{-ZnO}$ , and  $\text{Co}_{400}\text{-ZnO/Au}$ . (A) Wide-angle patterns and (B) Selected-angle patterns.



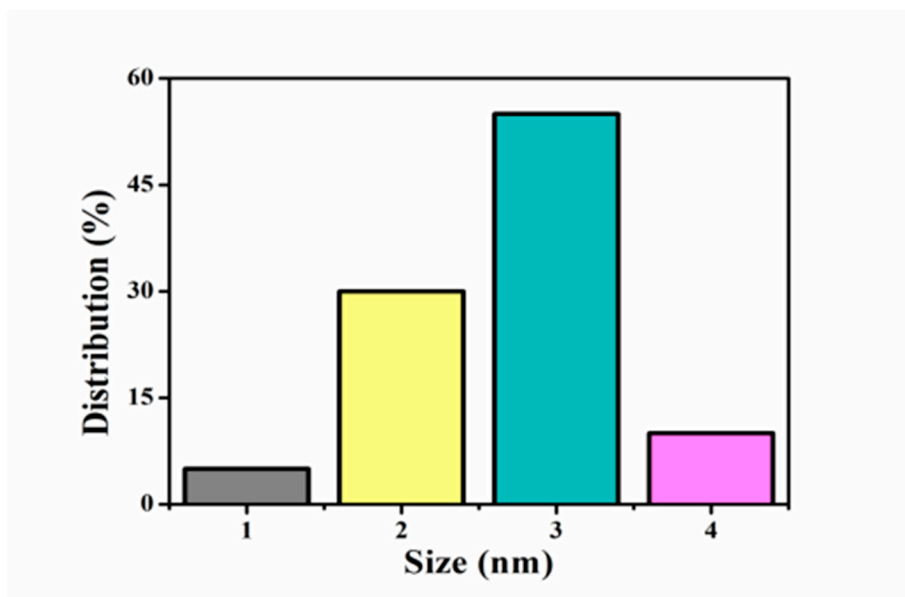

**Figure S18.** Size distribution of ZnO quantum dots in Co<sub>400</sub>-ZnO/Au.

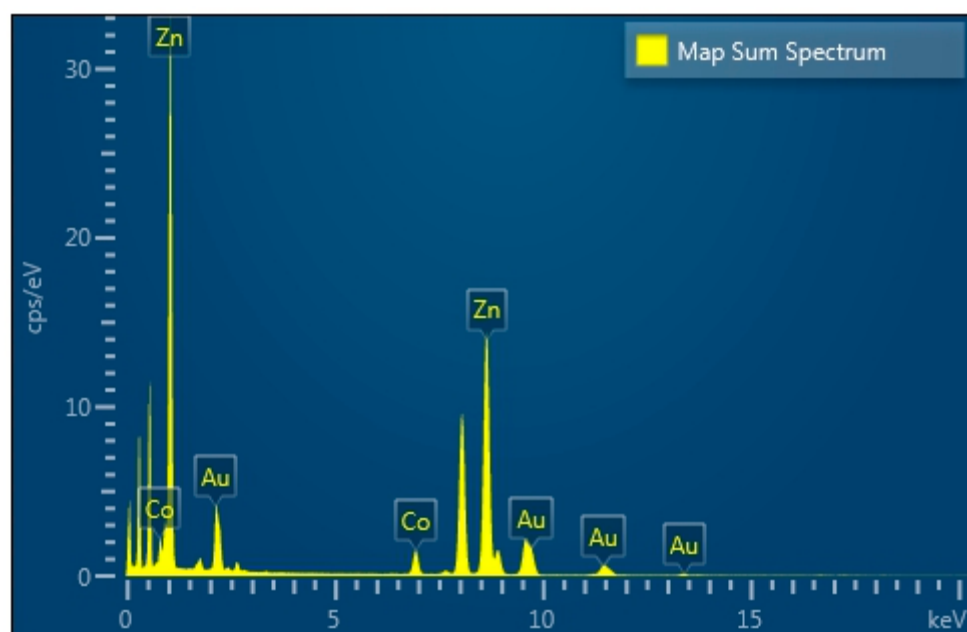

**Figure S19.** TEM-EDS result of Co-ZnO/Au.

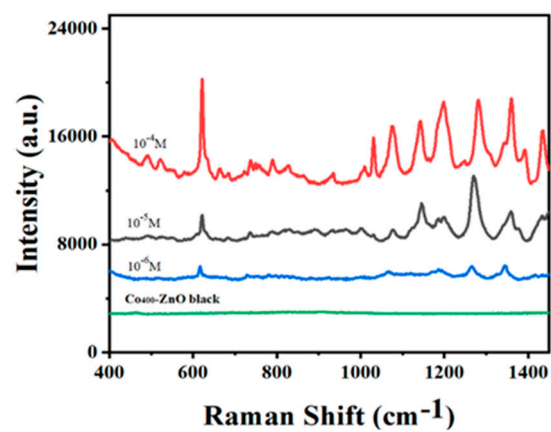

**Figure S20.** Concentration-dependent SERS spectra of R6G solutions recorded on Co<sub>400</sub>-ZnO.

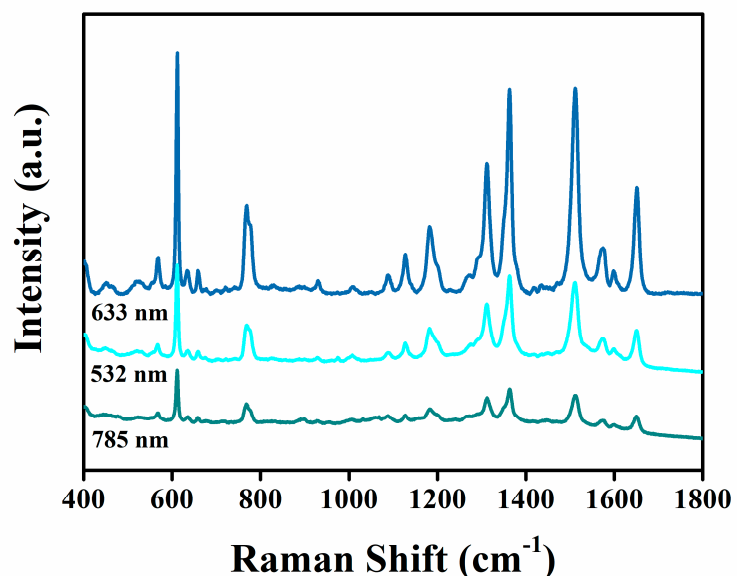

**Figure S21.** SERS spectra of R6G ( $10^{-7}$ ) recorded on Co<sub>400</sub>-ZnO/Au under different irradiations with 532, 633, and 785 nm lasers.

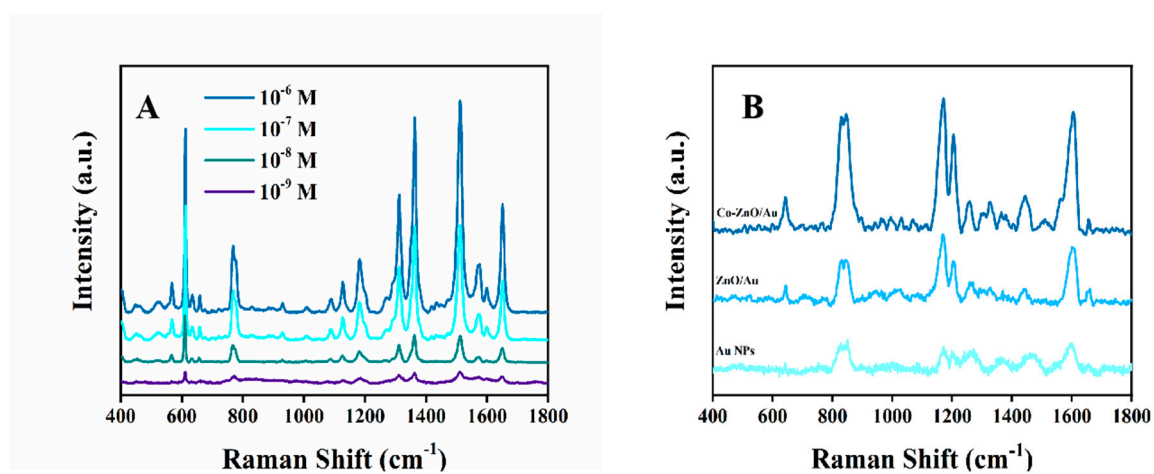

**Figure S22.** (A) SERS spectra of R6G molecules adsorbed onto Co-ZnO/Au. (B) SERS spectra of Tyr ( $1 \times 10^{-8}$  M) on Co-ZnO/Au, ZnO/Au, and Au NPs.



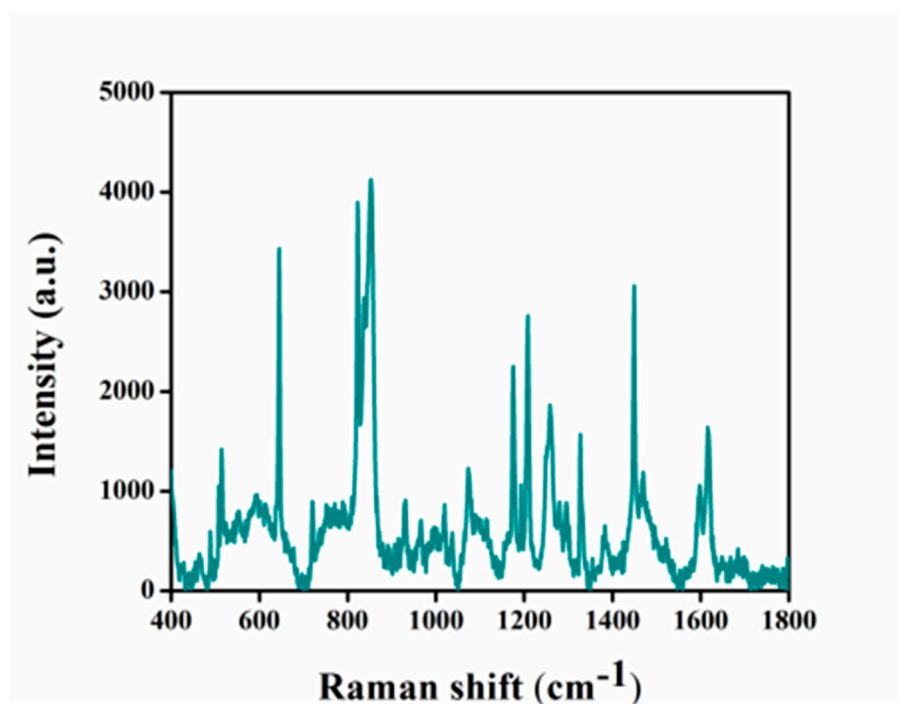

**Figure S23.** Normal Raman spectrum of powder Tyramine.

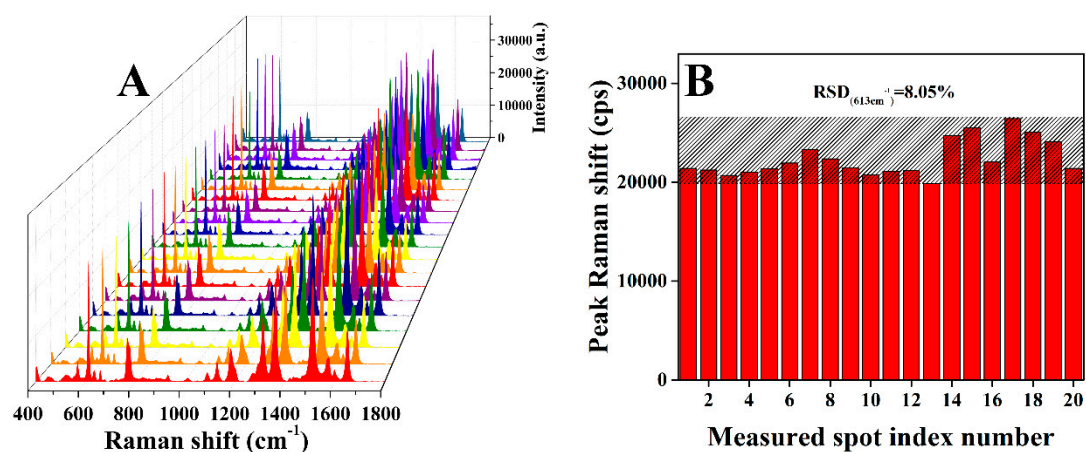

**Figure S24.** (A) SERS spectra of R6G ( $10^{-6}$  M) recorded from 20 randomly-selected points on Co<sub>400</sub>-ZnO/Au. (B) The statistic on Raman Intensities of R6 G ( $10^{-6}$  M) recorded from 20 randomly-selected points on Co<sub>400</sub>-ZnO/Au.

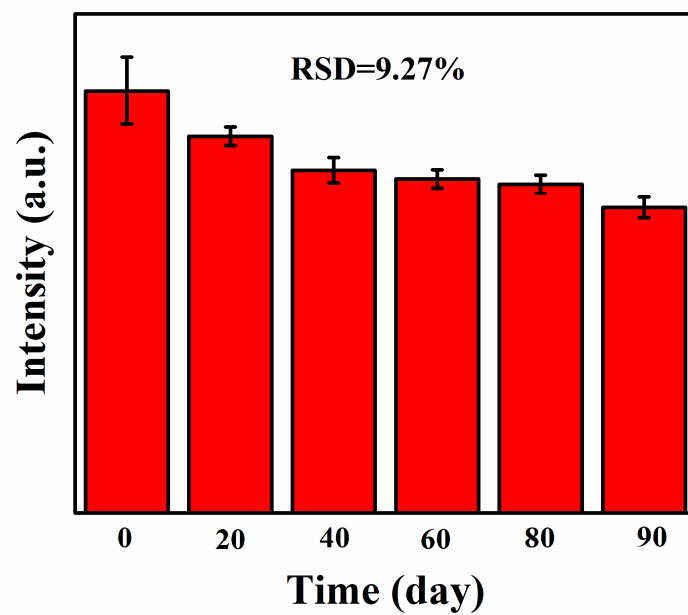

**Figure S25.** Raman intensities of R6G (10<sup>-6</sup> M) by using Co<sub>400</sub>-ZnO/Au monitored during storage in ambient condition for 90 days.



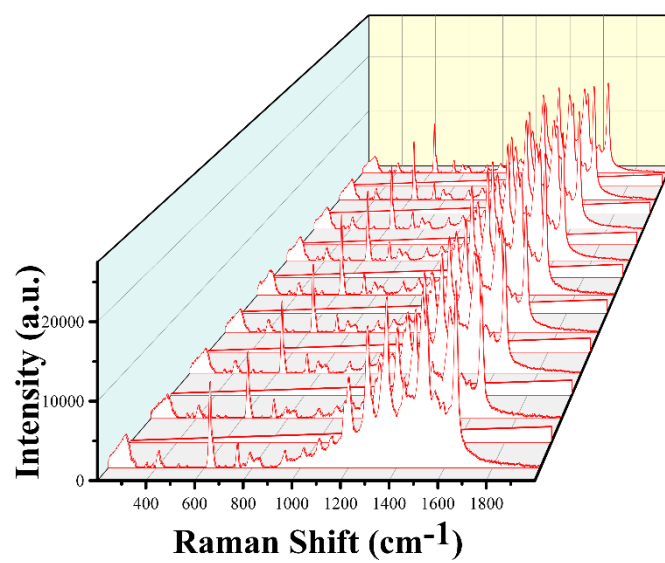

**Figure S26.** The SERS spectra of R6G (10<sup>-6</sup> M) recorded on the three batches of Co400-ZnO/Au substrate.

**Table S1.** Summary of Crystallite size ( $D$ ), Dislocation density ( $\rho$ ), and Micro strain ( $\varepsilon$ ).

| sample                 | Crystallite size<br>$D$ (nm) | Dislocation density<br>$\rho \times 10^{-3}$ (nm <sup>-2</sup> ) | Micro strain<br>$\varepsilon \times 10^{-3}$ |
|------------------------|------------------------------|------------------------------------------------------------------|----------------------------------------------|
| ZnO                    | 27.86435                     | 1.287960                                                         | 3.997792                                     |
| Co <sub>40</sub> -ZnO  | 21.71403                     | 2.120895                                                         | 5.126717                                     |
| Co <sub>120</sub> -ZnO | 24.51444                     | 1.664011                                                         | 4.543486                                     |
| Co <sub>200</sub> -ZnO | 22.23124                     | 2.023358                                                         | 5.012784                                     |
| Co <sub>280</sub> -ZnO | 24.22917                     | 1.703424                                                         | 4.598817                                     |
| Co <sub>400</sub> -ZnO | 22.59271                     | 1.95913                                                          | 4.930610                                     |
| Co <sub>480</sub> -ZnO | 22.96643                     | 1.895889                                                         | 4.847792                                     |
| Co <sub>600</sub> -ZnO | 22.3514                      | 2.001661                                                         | 4.983178                                     |

**Table S2.** Binding energy (BE) of Co in Co-ZnO samples.

| Sample                 | Co 2p <sub>3/2</sub> (eV) |                  | Satellite (eV)   |                  | Co 2p <sub>1/2</sub> (eV) |                  | Co <sup>2+</sup> /Co <sup>3+</sup> |
|------------------------|---------------------------|------------------|------------------|------------------|---------------------------|------------------|------------------------------------|
|                        | Co <sup>2+</sup>          | Co <sup>3+</sup> | Co <sup>2+</sup> | Co <sup>3+</sup> | Co <sup>2+</sup>          | Co <sup>3+</sup> |                                    |
| Co <sub>120</sub> -ZnO | 780.6                     | 796.38           | 781.12           | 799.56           | 785.53                    | 802.95           | 0.865456                           |
| Co <sub>200</sub> -ZnO | 779.85                    | 794.51           | 781.58           | 796.4            | 786.24                    | 801.99           | 0.886688                           |
| Co <sub>280</sub> -ZnO | 779.4                     | 794.77           | 780.91           | 796.45           | 786.4                     | 802.31           | 0.93761                            |
| Co <sub>400</sub> -ZnO | 779.51                    | 794.83           | 781.2            | 796.52           | 785.84                    | 802.37           | 0.957815                           |
| Co <sub>480</sub> -ZnO | 779.55                    | 794.52           | 780.81           | 796.65           | 784.78                    | 802.26           | 0.753678                           |
| Co <sub>600</sub> -ZnO | 779.58                    | 794.39           | 781.44           | 796.37           | 786.27                    | 801.8            | 0.887147                           |

**Table S3.** Binding energy (BE) of Zn and O in Co<sub>x</sub>-ZnO samples.

| Sample                 | Zn 2p (eV)           |                      | O 1s (eV)      |                |
|------------------------|----------------------|----------------------|----------------|----------------|
|                        | Zn 2p <sub>3/2</sub> | Zn 2p <sub>1/2</sub> | O <sub>L</sub> | O <sub>V</sub> |
| ZnO                    | 1021.26              | 1044.34              | 530.05         | 531.4          |
| Co <sub>40</sub> -ZnO  | 1021.20              | 1044.41              | 530.03         | 531.3          |
| Co <sub>120</sub> -ZnO | 1021.30              | 1044.40              | 529.95         | 531.29         |
| Co <sub>200</sub> -ZnO | 1021.20              | 1044.30              | 529.92         | 531.15         |
| Co <sub>280</sub> -ZnO | 1021.56              | 1044.56              | 530.38         | 531.9          |
| Co <sub>400</sub> -ZnO | 1021.44              | 1044.43              | 530            | 531.25         |
| Co <sub>480</sub> -ZnO | 1021.52              | 1044.73              | 530.36         | 532.01         |
| Co <sub>600</sub> -ZnO | 1021.28              | 1044.39              | 529.83         | 531.2          |

**Table S4.** The band gap (Eg) and optical absorption edge (nm) of pure ZnO and Co-ZnO samples.

| Sample                 | CB (eV) | VB (eV) | Eg (eV) | optical absorption edge (nm) |
|------------------------|---------|---------|---------|------------------------------|
| ZnO                    | -1.06   | 2.18    | 3.24    | 387                          |
| Co <sub>40</sub> -ZnO  | -1.05   | 2.06    | 3.11    | 393                          |
| Co <sub>120</sub> -ZnO | -0.68   | 2.35    | 3.03    | 395                          |
| Co <sub>200</sub> -ZnO | -0.82   | 2.23    | 3.05    | 460                          |
| Co <sub>280</sub> -ZnO | -1.41   | 1.7     | 3.11    | 457                          |
| Co <sub>400</sub> -ZnO | -0.27   | 2.49    | 2.76    | 479                          |
| Co <sub>480</sub> -ZnO | -0.58   | 2.27    | 2.85    | 465                          |
| Co <sub>600</sub> -ZnO | -0.58   | 2.3     | 2.88    | 467                          |

**Table S5.** Binding energy (BE) of ZnO, Co<sub>400</sub>-ZnO and Co<sub>400</sub>-ZnO/Au.

| Sample                    | BE (eV)           |                   |        |        |                   |                   |                   |                   |                   |                   |
|---------------------------|-------------------|-------------------|--------|--------|-------------------|-------------------|-------------------|-------------------|-------------------|-------------------|
|                           | Zn <sup>2+</sup>  |                   | O      |        | Co <sup>3+</sup>  |                   | Co <sup>2+</sup>  |                   | Satellite (eV)    |                   |
|                           | 2P <sub>1/2</sub> | 2P <sub>3/2</sub> | 1s     | 1s     | 2P <sub>1/2</sub> | 2P <sub>3/2</sub> | 2P <sub>1/2</sub> | 2P <sub>3/2</sub> | 2P <sub>1/2</sub> | 2P <sub>3/2</sub> |
| ZnO                       | 1044.08           | 1021.18           | 531.28 | 529.98 | --                | --                | --                | --                | --                | --                |
| Co <sub>400</sub> -ZnO    | 1044.43           | 1021.44           | 531.25 | 530.00 | 779.51            | 794.83            | 796.52            | 781.2             | 802.37            | 785.84            |
| Co <sub>400</sub> -ZnO/Au | 1044.39           | 1021.31           | 531.37 | 530.08 | 779.93            | 795.24            | 796.71            | 781.27            | 802.19            | 785.84            |
